# Supplementary material for: Ni–Sr/TiZr for H2 from methane via POM: Sr loading & optimization
Source: Royal Society of Chemistry journal article supplement (doi:10.1039/d4ra04781h), 2024-01-01
Supplement: d4ra04781h1.pdf [file d4ra04781h1.pdf]

## Ni-Sr/TiZr for H<sub>2</sub> from Methane via POM: Sr Loading & Optimization

Norah Alwadai<sup>1</sup>, Abdulaziz A.M. Abahussain<sup>2</sup>, Dharmesh M. Vadodariya<sup>3</sup>, Khaled M. Banabdwin<sup>2</sup>, Anis Hamza Fakeeha<sup>2</sup>, Jehad K. Abu-Dahrieh<sup>4</sup>, Naif S. Almuqati<sup>5</sup>, Ahmad M. Alghamdi<sup>6</sup>, Rawesh Kumar<sup>3\*</sup>, Ahmed Sadeq Al-Fatesh<sup>2\*</sup>

<sup>1</sup>Chemical Engineering Department, College of Engineering, King Saud University, Riyadh 11421, Saudi Arabia

<sup>2</sup>Department of Chemistry, Indus University, Ahmedabad, Gujarat, 382115, India

<sup>3</sup>School of Chemistry and Chemical Engineering, Queen's University Belfast, Belfast BT9 5AG, UK

\*Corresponding Authors: Ahmed S. Al-Fatesh ([aalfatesh@ksu.edu.sa](mailto:aalfatesh@ksu.edu.sa)), Jehad Abu-Dahrieh ([j.abudahrieh@qub.ac.uk](mailto:j.abudahrieh@qub.ac.uk)), Rawesh Kumar ([kr.rawesh@gmail.com](mailto:kr.rawesh@gmail.com))

**Table S1: CO<sub>2</sub> Desorbed Amount calculated form CO<sub>2</sub> – TPD.**

| Catalyst                                      | CO <sub>2</sub> Desorbed Amount<br>(cm <sup>3</sup> /g STP) |
|-----------------------------------------------|-------------------------------------------------------------|
| 5Ni/30TiO <sub>2</sub> +ZrO <sub>2</sub>      | 0.492                                                       |
| 5Ni1Sr/30TiO <sub>2</sub> +ZrO <sub>2</sub>   | 2.01                                                        |
| 5Ni2Sr/30TiO <sub>2</sub> +ZrO <sub>2</sub>   | 1.47                                                        |
| 5Ni2.5Sr/30TiO <sub>2</sub> +ZrO <sub>2</sub> | 2.52                                                        |
| 5Ni3Sr/30TiO <sub>2</sub> +ZrO <sub>2</sub>   | 2.74                                                        |

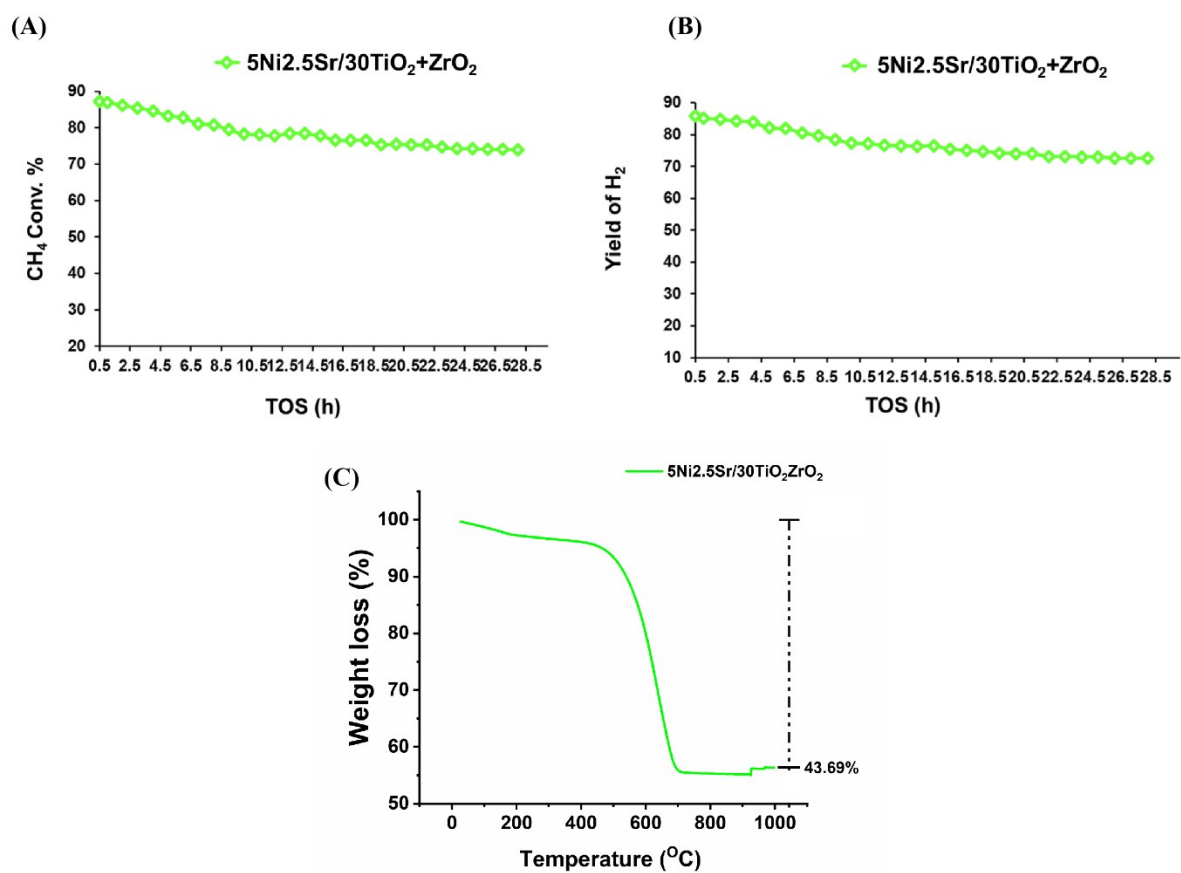

**Fig. S1:** The long-time on-stream study of Ni<sub>5</sub>2.5Sr/30TiO<sub>2</sub>+ZrO<sub>2</sub> (A) CH<sub>4</sub> conversion (%) vs TOS (h) (B) H<sub>2</sub> Yield (%) vs TOS (h). (C) Thermogravimetric analysis of spent 5Ni<sub>2.5</sub>Sr/30TiO<sub>2</sub>ZrO<sub>2</sub> catalyst (after 28.5hour reaction) at 800 °C reaction temperature, 0.35 O<sub>2</sub>/CH<sub>4</sub> ratio, and 10000 space velocity
